# Supplementary material for: Software-aided approach to investigate peptide structure and metabolic susceptibility of amide bonds in peptide drugs based on high resolution mass spectrometry
Source: PLOS journal article supplement (doi:10.1371/journal.pone.0186461), 2017-11-01
Supplement: S2 (10.1371/journal.pone.0186461.s002) [file journal.pone.0186461.s002]

**Supporting Table 2: MS/MS experimental settings**

| Setting name                                                | Dataset 1                                   | Dataset 2                                     |
|-------------------------------------------------------------|---------------------------------------------|-----------------------------------------------|
| <b>Parameter types are source and gas</b>                   | CUR=25<br>(Curtain Gas)                     | CUR = 25<br>(Curtain Gas)                     |
|                                                             | GS1=45<br>(Ion Source Gas 1)                | GS1 = 45<br>(Ion Source Gas 1)                |
|                                                             | GS2=60<br>(Ion Source Gas 2)                | GS2 = 60<br>(Ion Source Gas 2)                |
|                                                             | ISVF=5500 V<br>(Ion Spray Voltage Floating) | ISVF = 5500 V<br>(Ion Spray Voltage Floating) |
|                                                             | TEM=500°C<br>(Temperature)                  | TEM = 500°C<br>(Temperature)                  |
| <b>The settings for TOF MS</b>                              | CE=10 eV<br>(Collision Energy)              | CE = 10 eV<br>(Collision Energy)              |
|                                                             | DP=80 eV (De-clustering Potential)          | DP = 80 eV (De-clustering Potential)          |
|                                                             | Mass Range 130-1200 m/z                     | Mass Range 130-1200 m/z                       |
|                                                             | Accumulation Time 80 ms                     | Accumulation Time 80 ms                       |
| <b>The IDA (Information Dependent Acquisition) criteria</b> | Intensity is greater than 450 cps           | Intensity threshold 1000 cps                  |
|                                                             | Spectra is 10, excluded for 4 seconds       | TopN 5 dynamic exclusion 2.5 seconds          |
|                                                             | Mass Tolerance is 25 ppm                    | Mass Tolerance is 25 ppm                      |
|                                                             | Excluded after 3 occurrences                | Excluded after 3 occurrences                  |
|                                                             | Excluded isotope is 4 Da                    | Excluded isotope is 4 Da                      |
| <b>The settings for the MS/MS</b>                           | CE=40 eV                                    | CE = 40 eV                                    |
|                                                             | CES=20 eV<br>(Collision Energy Spread)      | CES = 20 eV<br>(Collision Energy Spread)      |
|                                                             | DP=80 eV                                    | DP = 80 eV                                    |
|                                                             | Mass Range m/z 50-1200                      | Mass Range m/z 50-1200                        |
|                                                             | Accumulation Time 50.0 ms                   | Accumulation Time 50.0 ms                     |
